# Supplementary material for: Anterior uveitis in patients with spondyloarthritis treated with secukinumab or tumour necrosis factor inhibitors in routine care: does the choice of biological therapy matter?
Source: HighWire-hosted journal article supplement (doi:10.1136/annrheumdis-2021-220420), 2021-06-15
Supplement: annrheumdis-2021-220420supp001_data_supplement.pdf [file annrheumdis-2021-220420supp001_data_supplement.pdf]

**Supplementary table S1. ICD10-codes and ATC-codes used to define cases, comorbidities and outcomes.**

| <b>Diagnosis</b>                   | <b>ICD10-codes</b>         |
|------------------------------------|----------------------------|
| Ankylosing spondylitis             | M45                        |
| Undifferentiated spondyloarthritis | M46.8, M46.9, M46.0, M46.1 |
| Anterior uveitis                   | H20, H221                  |
| Inflammatory bowel disease         | K50, K51                   |
| Psoriasis                          | L40                        |
|                                    |                            |
| <b>Treatment</b>                   | <b>ATC-codes</b>           |
| Psoriasis treatment                | D05, excluding D05AA       |

**Supplementary table S2. Univariable HR for on-treatment anterior uveitis.**

*Legend: For dichotomous variables, the reference is zero. CRP= C-reactive protein, ESR= erythrocyte sedimentation rate, IBD= inflammatory bowel disease, csDMARD= conventional synthetic disease modifying anti-rheumatic drugs. BASDAI= Bath Ankylosing Spondylitis Disease Activity Index, ASDAS= Ankylosing Spondylitis Disease Activity Score.*

| Variables                             | Hazard Ratio | p-value |
|---------------------------------------|--------------|---------|
| Sex (0= women/1=men)                  | 1.15         | 0.220   |
| Age, continuous                       | 1.01         | 0.054   |
| CRP, continuous                       | 1.01         | 0.114   |
| ESR, continuous                       | 1.00         | 0.289   |
| IBD ever (0 = no /1 =yes)             | 0.83         | 0.467   |
| Psoriasis ever (0 = no /1 =yes)       | 1.18         | 0.437   |
| csDMARD at baseline (0 = no /1 =yes)  | 1.07         | 0.623   |
| BASDAI, continuous                    | 0.86         | <0.0001 |
| ASDAS, continuous                     | 0.81         | 0.011   |
| Patient global assessment, continuous | 0.99         | <0.0001 |
| History of AU in:                     |              |         |
| never                                 | reference    |         |
| <1year                                | 64           | <0.0001 |
| 1-2 years                             | 20           | <0.0001 |
| 2-3 years                             | 17           | <0.0001 |
| 3-4 years                             | 15           | <0.0001 |
| 4-5 years                             | 6            | 0.0023  |
| 5-10 years                            | 8            | <0.0001 |

**Supplementary table S3. Number of patients, events and follow-up time for analysis of anterior uveitis rates.**

*Legend: Flare definition 1: all registered visits with an AU-diagnosis separated by a gap of at least 90 days without any AU diagnosis; Flare definition 2: all registered visits with an AU diagnosis occurring at least 60 days after a previous registration (irrespective of any visits in-between). AU= anterior uveitis*

| All treatment lines | N patients | N with any AU diagnosis | N of AU diagnoses | N AU flare definition 1 | N AU flare definition 2 | Follow-up years |
|---------------------|------------|-------------------------|-------------------|-------------------------|-------------------------|-----------------|
| Adalimumab          | 1006       | 25                      | 54                | 27                      | 29                      | 1336            |
| Secukinumab         | 456        | 13                      | 31                | 13                      | 14                      | 459             |
| Etanercept          | 1800       | 52                      | 168               | 63                      | 74                      | 2239            |
| Infliximab          | 783        | 13                      | 29                | 14                      | 14                      | 1013            |
| Golimumab           | 500        | 22                      | 64                | 28                      | 31                      | 944             |
| Certolizumab        | 306        | 6                       | 16                | 7                       | 7                       | 356             |

**Supplementary table S4. Number of patients, events and follow-up time for analysis of rate ratios of anterior uveitis after switching adalimumab to other treatment.**

*Legend: Flare definition 1: all registered visits with an AU-diagnosis separated by a gap of at least 90 days without any AU diagnosis; Flare definition 2: all registered visits with an AU diagnosis occurring at least 60 days after a previous registration (irrespective of any visits in-between). AU= anterior uveitis*

| Drug-pairs   | N patients | N with any AU diagnosis | N of AU diagnoses | N AU flare definition 1 | N AU flare definition 2 | Follow-up years |
|--------------|------------|-------------------------|-------------------|-------------------------|-------------------------|-----------------|
| Adalimumab   | 74         | 11                      | 56                | 16                      | 25                      | 173             |
| Secukinumab  | 74         | 10                      | 62                | 16                      | 31                      | 70              |
|              |            |                         |                   |                         |                         |                 |
| Adalimumab   | 200        | 20                      | 174               | 46                      | 76                      | 290             |
| Infliximab   | 200        | 20                      | 176               | 44                      | 65                      | 472             |
|              |            |                         |                   |                         |                         |                 |
| Adalimumab   | 516        | 35                      | 175               | 63                      | 86                      | 919             |
| Etanercept   | 516        | 61                      | 514               | 133                     | 206                     | 1232            |
|              |            |                         |                   |                         |                         |                 |
| Adalimumab   | 217        | 33                      | 323               | 84                      | 128                     | 541             |
| Golimumab    | 217        | 40                      | 299               | 88                      | 132                     | 493             |
|              |            |                         |                   |                         |                         |                 |
| Adalimumab   | 112        | 11                      | 72                | 20                      | 28                      | 235             |
| Certolizumab | 112        | 11                      | 148               | 25                      | 49                      | 144             |

**Supplementary table S5. Standardized differences among matched pairs in propensity score matched analyses, for variables described in table 4.**

|                | SEC vs ETN | ADA vs ETN | IFX vs ETN | GOL vs ETN | CER vs ETN |
|----------------|------------|------------|------------|------------|------------|
| Line           | 0.008      | 0.013      | 0.012      | 0.068      | 0.026      |
| Age            | 0.049      | 0.027      | 0.037      | 0.049      | 0.063      |
| Sex            | 0.056      | 0.002      | 0.022      | 0.039      | 0.008      |
| AU ever        | 0.050      | 0.017      | 0.041      | 0.043      | 0.039      |
| AU 1 year      | 0.015      | 0.021      | 0.005      | 0.048      | 0.000      |
| Patient Global | 0.235      | 0.138      | 0.012      | 0.121      | 0.023      |
| BASDAI         | 0.321      | 0.107      | 0.047      | 0.125      | 0.044      |
